# Supplementary material
Source: PubMed Central journal article supplement (PMC1681472)
Supplement: msb4100025-s1.pdf [file msb4100025-s1.pdf]

**Table S1.** Errors in synthesis & construction of section *alpha*

| <b>Location on T7.1<br/>(Genome Position)</b>          | <b>Nature of<br/>Difference</b>                  | <b>Probable Reason for<br/>Difference</b>                                   | <b>Expected Outcome</b>                                                                |
|--------------------------------------------------------|--------------------------------------------------|-----------------------------------------------------------------------------|----------------------------------------------------------------------------------------|
| <b>D1L (164-170),<br/>D1R &amp; D2L (338-<br/>350)</b> | Restriction sites were not added in construction | Difficulties in manipulating left end of genome resulted in using wild-type | Loss of manipulability in part 1 (containing A0)                                       |
| <b>gene 0.4 (1418)</b>                                 | Single base deletion                             | Unknown                                                                     | Frameshift after 27 <sup>th</sup> amino acid followed by early termination of gene 0.4 |
| <b>D6L (1304-1310)<br/>D6R (1494-1500)</b>             | Restriction sites appear twice.                  | Inefficiency of digestion of scaffold                                       | No expected change                                                                     |
| <b>gene 0.6B</b>                                       | Single base addition                             | Error is known to be in stock of wild-type genome                           | Dependent upon nature of putative translational slippage in formation of gene 0.6B     |
| <b>D11L (3302-3307)</b>                                | Restriction site appears twice                   | Inefficiency of digestion of scaffold                                       | No expected change                                                                     |
| <b>gene 1 (4877)</b>                                   | Single base mutation                             | Error in PCR or within wild-type genome                                     | Silent mutation, no expected change                                                    |
| <b>gene 1 (5159)</b>                                   | Single base mutation                             | Error in PCR or within wild-type genome                                     | Silent mutation, no expected change                                                    |
| <b>gene 1 (5399)</b>                                   | Single base mutation                             | Error in PCR or within wild-type genome                                     | Silent mutation, no expected change                                                    |
| <b>D14R (6591-6597)</b>                                | Restriction site appears twice                   | Inefficiency of digestion of scaffold                                       | No expected change                                                                     |
| <b>TE (7827)</b>                                       | Single base deletion                             | Primer synthesis error                                                      | Possible loss of function of transcriptional terminator.                               |
| <b>D20L (8082-8086)</b>                                | Restriction site appears twice                   | Inefficiency of digestion of scaffold                                       | No expected change                                                                     |
| <b>U4 (8153-8159)</b>                                  | Restriction site was not added in construction   | Failure in site-directed mutagenesis                                        | Loss of manipulability of overlap in parts 18 and 19                                   |
| <b>D22L (8247-8253)</b>                                | Restriction site appears twice                   | Inefficiency of digestion of scaffold                                       | No expected change                                                                     |

**Table S2.** Errors in synthesis & construction of section *beta*

| <b>Location on T7.1</b>       | <b>Nature of Difference</b> | <b>Probable Reason for Difference</b>       | <b>Expected Outcome</b>                                                                              |
|-------------------------------|-----------------------------|---------------------------------------------|------------------------------------------------------------------------------------------------------|
| <b>gene 1.7 (8794)</b>        | Single base silent mutation | Error during PCR or within wild-type genome | No expected change                                                                                   |
| <b>gene 1.8 (9245)</b>        | Single base mutation        | Error during PCR or within wild-type genome | Amino acid change in gene 1.8 from Asp to Gly                                                        |
| <b>gene 2.0 (9447)</b>        | Single base mutation        | Error during PCR or within wild-type genome | Amino acid change in gene 2.0 from Glu to Val                                                        |
| <b>gene 2.5 (10351)</b>       | Singe base deletion         | Error during primer design                  | deletion in stop codon; read-through adding on 8AA                                                   |
| <b>gene 2.8 (10627)</b>       | Single base mutation        | Error during PCR                            | Amino acid change in gene 2.8 from Asp to Gly                                                        |
| <b>gene 2.8 (10717-10803)</b> | 82 base deletion            | Error in cloning of part                    | Loss of function in gene 2.8 in addition to unknown effect on translation of 3.0 due to read-through |
| <b>gene 3.0 (10926)</b>       | Single base silent mutation | Error during PCR or within wild-type genome | No expected change                                                                                   |
