# Supplementary material
Source: PubMed Central journal article supplement (PMC1681472)
Supplement: msb4100025-s3.pdf [file msb4100025-s3.pdf]

## 1. Wild-type Genome

---

---

### 2a. Wild-type Genetic Elements

1. T7 RNA Polymerase
2. T7 DNA Polymerase
3. Major Capsid Protein
4. *E.coli* RNA Pol. Promoter A1
5. T7 RNA Pol. Promoter  $\phi 10$
- ⋮

### 2b. Wild-type Element Sequences

1. atgaacacgattaacatcgctaagaacg...
  2. atgacgtttctgacatcgaagctaacg...
  3. atggctagcatgactggtggacagcaaa...
  4. ?????atcaaaaagagtattgacttaa...
  5. ?????taatacgactcactatagggaga...
  - ⋮
- 

### 3a. Refactored Parts

1. [T7 RNA Polymerase]
2. [T7 DNA Polymerase]
3. [Major Capsid Protein]
4. [E.coli RNA Pol. Promoter A1]
5. [T7 RNA Pol. Promoter  $\phi 10$ ]
- ⋮

### 3b. Part Sequences

1. [atgaacacgattaacatcgctaagaacg...]
  2. [atgacgtttctgacatcgaagctaacg...]
  3. [atggctagcatgactggtggacagcaaa...]
  4. [atcaaaaagagtattgacttaaagtcta...]
  5. [acttcgaaattaatacgactcactatag...]
  - ⋮
- 

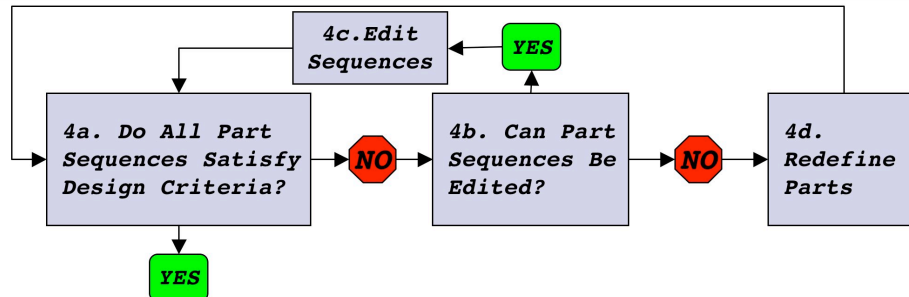

## 5. Compile Refactored Genome Sequence, Construct, Test

[Part 1][Part 2][Part 3][Part 4][Part 5][Part 6][Part 7][Part 8][Part 9][Part 10]...

---

---

**Figure S1.** Genome design algorithm. Step 1. Obtain the DNA sequence of the genome of a natural biological system. Step 2. Annotate the genome, (a) listing all known biological functions and (b) their known or putative coding sequence(s). Step 3. Independent of steps 1 and 2, (a) list all desired higher-level functions to be encoded in the engineered genome and (b) define the DNA sequence encoding each function as a part; edit the DNA sequence of parts in order to meet any sequence design rules (e.g., one function per part). Step 4. Check and, as necessary, redefine part sequences and boundaries until all design criteria are met. Step 5. Compile edited parts into a genome, construct, and test.

**Figure S2.** Genome design. We split the wild-type T7 genome into six sections, alpha through zeta, using five restriction sites unique across the natural sequence. Each section shown here has a wild-type section with representations of the genetic elements: protein coding regions (blue), ribosome binding sites (purple), promoters (green), RNase III recognition sites (pink), transcription terminators (yellow), and others (gray). Elements are labeled by convention [7]. Images are not to scale, but overlapping boundaries indicate elements with shared sequence. The useful natural restriction sites across each section are shown (black lines). T7.1 sections are shown below the wild-type sections. Parts are given integer numbers, 1 through 73, starting at the left end of the genome. Unique restriction site pairs bracket each part (red/blue lines, labeled D[part #]L/R). Added unique restriction sites (purple lines, U[part #]) and part length (# base pairs, open boxes) are shown.

### Section Alpha

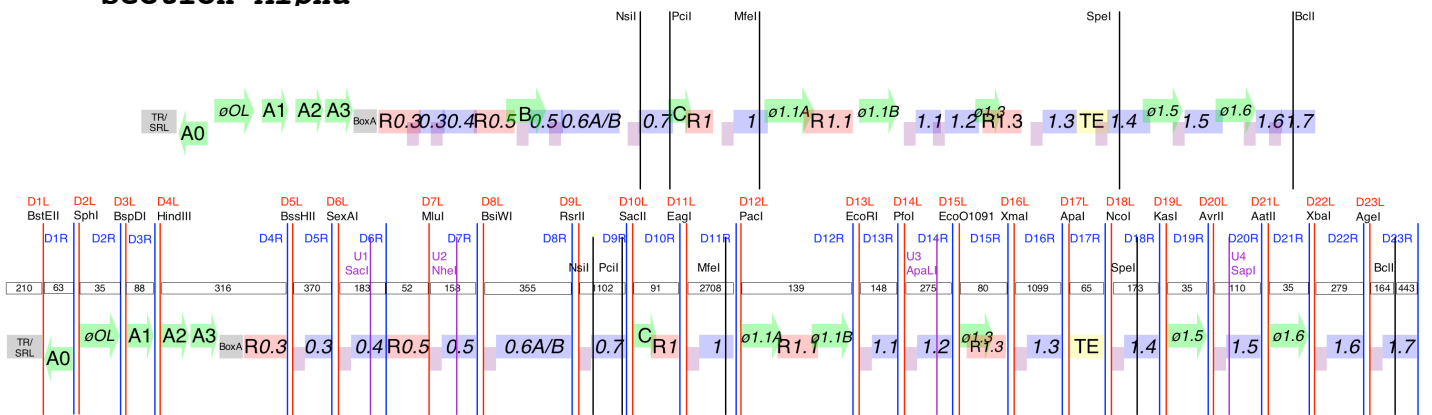

### Section Beta

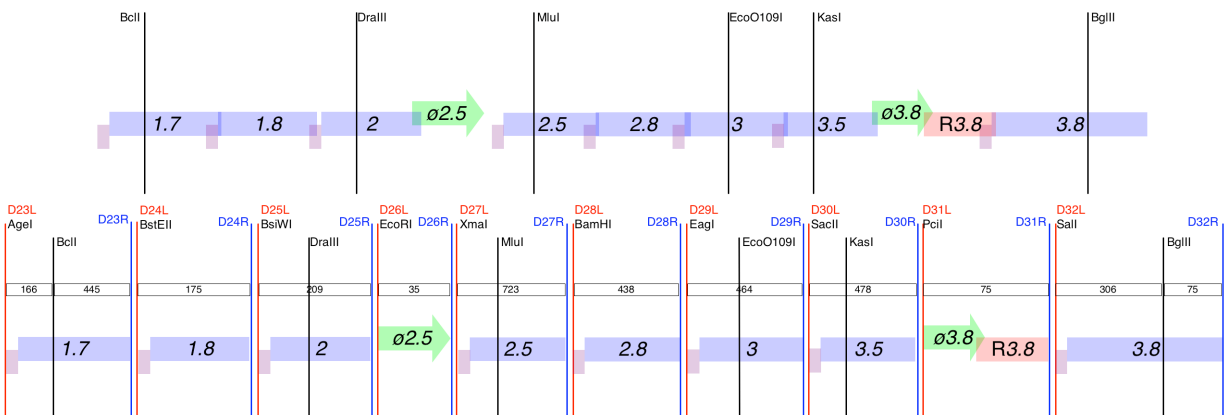

## Section Gamma

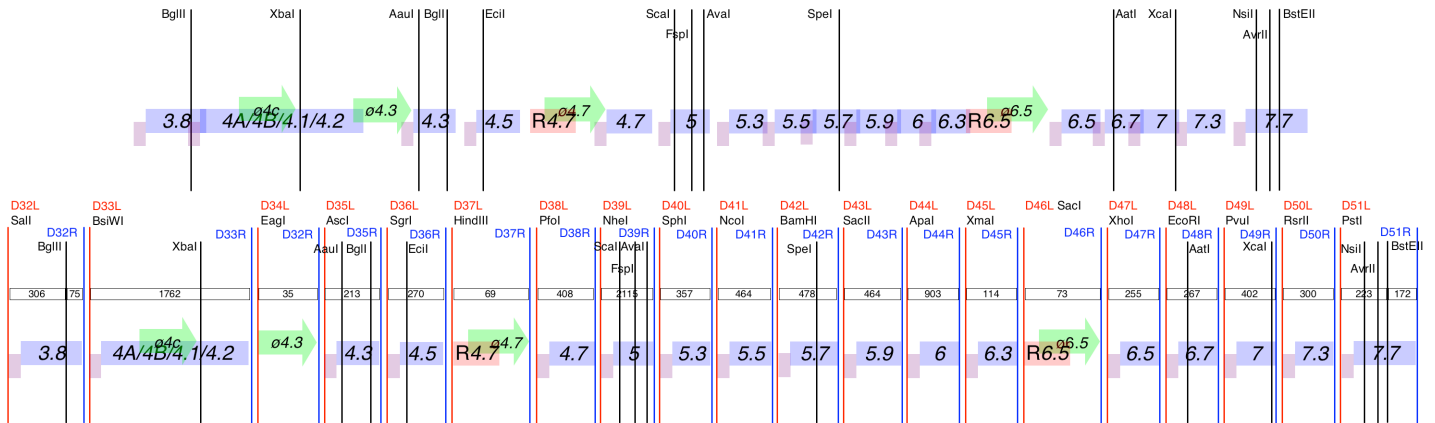

## Section Delta

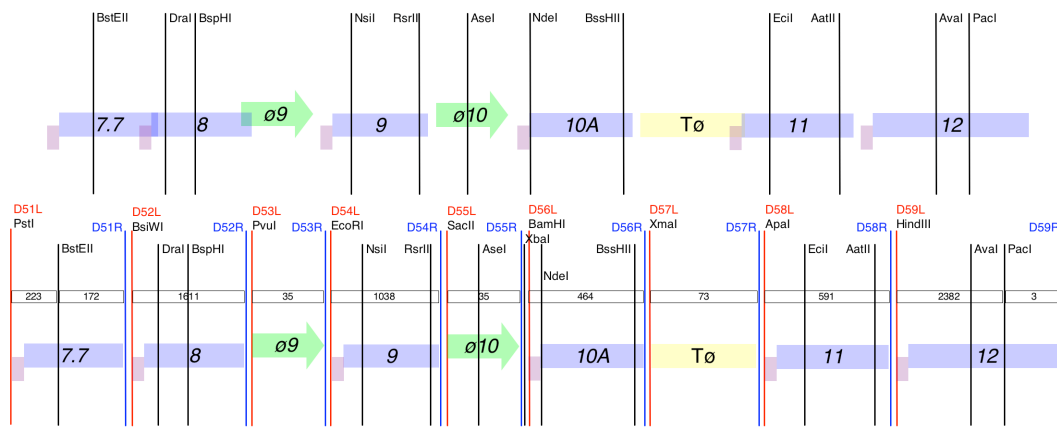

## Section Epsilon

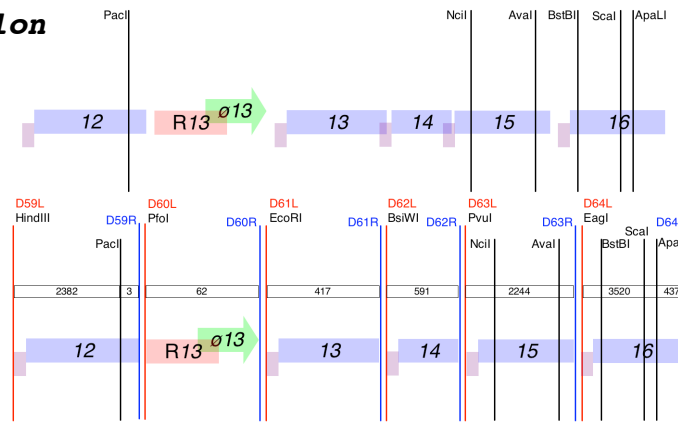

## Section zêta

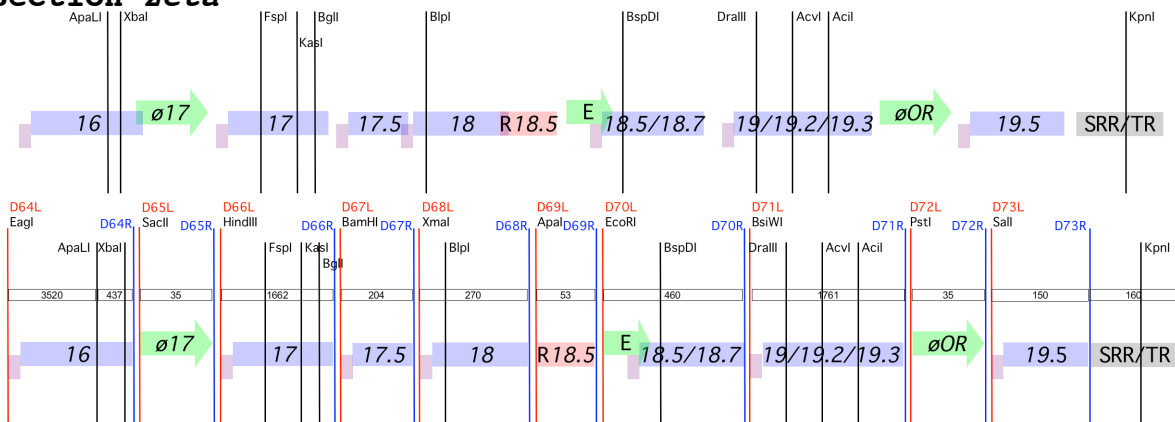

**Figure S3.** Differences between wild-type T7 and T7.1. A listing from left to right on the T7 genome of the changes made during design of T7.1. Changes are shown by comparison of the annotated wild-type T7 (above) and T7.1 (below) sequences. Point mutations are capitalized. The natural ribosome binding sites are underlined. The bracketing restriction sites surrounding parts are orange (left cutter) and blue (right cutter), with overlaps of neighboring bracketing restriction sites in light green. Other features include start codons (green), stop codons (red), and overlaps of start and stop codons (purple).

### Changes in Section Alpha

#### LeftEnd-Part1: TR-SRL/A0

```
T7:      gagtgtctctctgtgtccctatctgttacagtctcctaaagtatcctcct
-----TR-----> <-----SRL-----
T7.1:    gagtgtctctctgtgtccctatcGgttacCgtctcctaaagtatcctcct
-----TR-----> <-D1L-> <-----SRL-----
```

#### Part1-Part2: SRL/A0-∅OL

```
T7:      acctaaagacgccttgtgttagccataaagtataacctttaacattgtctttattaa
--SRL--> <-----∅OL-----
T7.1:    acctaaagGTTaccgcatgcttgtgttagccataaagtataacctttaacattgtctttattaa
--SRL--> <D2L-> <-----∅OL-----
          <-D1R->
```

#### Part2-Part3: ∅OL-A1

```
T7:      aaggagagacaacttaagagagacttaaaagattaatttaaaattatcaaaaag
---∅OL--> <-----A1-----
T7.1:    aaggagagacaacttaagagCATgcttaaaagattaatcgatataaaattatcaaaaag
---∅OL--> <D2R-> <D3L-> <-----A1-----
```

#### Part3-Part4: A1-A2/A3/BoxA/R0.3

```
T7:      gagagggacacggcgaatagccatcccaatcgacaccgggtcaaccggataagtagacagcctgataagtcgcacgaaaaacagg
---A1-----> <-----A2-----
T7.1:    gagagggacacggcgaatagccatcccaatcgataccgggtcaaccggataagtagaAagcTtgataagtcgcacgaaaaacagg
---A1-----> <D3R-> <D4L-> <-----A2-----
```

#### Part4-Part5: A2/A3/BoxA/R0.3-0.3

```
T7:      gatattcactaataactgcacgaggttaacacaagatggctatgtctaaaca
---R0.3--> <-0.3RBS-> <-----0.3-----
T7.1:    gatattcactaagccttgccgctgcacgaggttaacacaagatggctatgtctaaaca
---R0.3--> <D5L-> <-0.3RBS-> <-----0.3-----
          <D4R->
```

#### Part5-Part6: 0.3-0.4

```
T7:      cgaggagtacgaggagatgaagagtaagtgtctactacc
-----0.3-----> <-----0.4-----
          <-0.4RBS->
T7.1:    cgaggagtacgaggaggaCgaagagtaagcgcaccaggctcaggagtagcaggagatgaagagtaagtgtctactacc
-----0.3-----><D5R-><-D6L-> <-0.4RBS-> <-----0.4-----
```

#### U1-R0.5: U1/0.4-R0.5

```
T7:      caaagaactgtacgaaaaacaaggcaatagctttagaatctgctgagtgatagactcaaggtc
-----0.4-----> <-----R0.5-----
T7.1:    caaagaGctCtagcgaacacaaggcaatagctttagaatctgctgagtgaaccagggtgagtgatagactcaaggtc
-----0.4-----><-D6R-><-----R0.5-----
          <-U1->
```

#### R0.5-Part7: R0.5-0.5

```
T7:      gcctttatgattatcactttactttatgagggagtaagtatatgctt
-----R0.5-----> <-0.5RBS-><-----0.5-----
T7.1:    gcctttatgattatcacttacggctttatgagggagtaagtatatgctt
-----R0.5-----><D7L-> <-0.5RBS-><-----0.5-----
```

#### U2

```
T7:      gctctaggctagctgtaggtgatcc
-----0.5-----
T7.1:    gctctaggGctagctgtaggtgatcc
-----0.5-----
          <-U2->
```

Part7-Part8: 0.5-0.6A/B

T7: catcaaaagggcactacgcaaatgatgaagcac
-----0.5----->
<-0.6RBS-> <----0.6---->
T7.1: catcaaaagggcactacgcaaatAaacgcgtagcgcgcaaaagggcactacgcaaatgatgaagcac
-----0.5-----><D7R-> <-0.6RBS-> <----0.6---->
<D8L->

Part8-Part9: 0.6A/B-0.7

T7: aacaggcactagccaacacactgaacgctatctcataacgaacataaggacacaaatgaacattacc
-----0.6-----> <-0.7RBS-> <----0.7---->
T7.1: aacaggcactagcgtaacggccgcgaacataaggacacaaatgaacattacc
-----0.6-----><D8R-> <-0.7RBS-> <----0.7---->
<-D9L->

Part9-Part10: 0.7-C/R1

T7: caacattgataagcaacttgacgcaatgtaatggcgtgatagctttatct
-----0.7-----> <----R1---->
<-----C----->
T7.1: caacattgataagcaacttgacgcaatgtaatggcgtgatagctttatct
-----0.7-----><-D9R-><D10L><-----C----->
<----R1---->

Part10-Part11: C/R1-1

T7: ataggtacgatttactaactggaagggcactaaatgaacacgatt
-----R1-----> <-IRBS-> <----1----->
T7.1: ataggtacgatttactaactcggcgctggaagggcactaaatgaacacgatt
-----R1-----><D10R> <-IRBS-> <----1----->
<D11L>

Part11-Part12: 1-ø1.1A/R1.1/ø1.1B

T7: gcgttcgctaacgccaaatcaatcagactcactatagaggacaaac
-----1-----> <----R1.1----->
<-----ø1.1A----->
T7.1: gcgttcgctaacggcgcttaattaaacgccaaatcaatcagactcactatagaggacaaac
-----1-----><D11R><-D12L-><-----ø1.1A----->
<----R1.1----->

Part12-Part13: ø1.1A/R1.1/ø1.1B-1.1

T7: tataggagaaccttaagtttaactttaagacccttaagtgttaattagagatttaaataaagaattactaagagaggactttaagtatgcgtaacttc
---ø1.1B---> <-1.1RBS-> <----1.1---->
T7.1: tataggagaaccttaagtttaactttaagacccttaagtgttaattaaagatttaaataaagaattCctaaagagaggactttaagtatgcgtaacttc
---ø1.1B---><-D12R-> <D13L> <-1.1RBS-> <----1.1---->

Part13-Part14: 1.1-1.2

T7: ctggagggctcagtaagatgggacgttta
-----1.1-----> <----1.2----->
<-1.2RBS->
T7.1: ctggagggctcagtaagatccaggactgggagggctcagtaagatgggacgttta
-----1.1-----><D13R> <-1.2RBS-> <----1.2----->
<D14L->

U3

T7: gacgaggacgttctgttcaatatgtgtactgattggtgaacat
-----1.2----->
T7.1: gacgaggacgttctgttcaatatgtgCactgattggtgaacat
-----1.2----->
<-U3->

Part14-Part15: 1.2-ø1.3/R1.3

T7: gttgaaggactggaagtaatacactcagatagggacaa
-----1.2-----> <----R1.3--->
<-----ø1.3----->
T7.1: gttgaaggactggaagtaataccaggaccggactggaagtaatacactcagatagggacaa
-----1.2-----><D14R-> <-----ø1.3----->
<D15L-> <----R1.3--->

Part15-Part16: ø1.3/R1.3-1.3

T7: atttaaccaataggagataaacattatgatgaacatt
----R1.3---> <----1.3--->
<-1.3RBS->
T7.1: atttaaccaataggagccgggccaataggagataaacattatgatgaacatt
----R1.3---> <D16L> <-1.3RBS-> <----1.3--->
<D15L->

Part16-Part17: 1.3-TE

T7: agagaaaatgtaatacactggctcaccttcgggtggcctt
-----1.3-----> <-----TE----->
T7.1: agagaaaatgtaaccgggccaataatgtaatacactggctcaccttcgggtggcctt
-----1.3-----><D16R> <-----TE----->
<D17L>

Part17-Part18: TE-1.4

T7: gcctttctcgctttataaggagacactttatgtttaagaag
-TE--> <1.4RBS > <----1.4---->

T7.1: gcctttcagggaaaacgggcccattggtataaggagacactttatgtttaagaag  
-TE--> <D17R> <1.4RBS> <----1.4---->  
<D18L>

#### Part18-Part19: 1.4-ø1.5

T7: cgtgtggagatagttaactggtaatacagactcactaaagg  
-----1.4----->  
<-----ø1.5----->  
T7.1: cgtgtggagatagttaactggtaatacagactcactaaagg  
-----1.4-----> <D18R> <-----ø1.5----->  
<D19L>

#### Part19-Part20: ø1.5-1.5

T7: taaaggaggtacacaccatgatgtactta  
----ø1.5----> <----1.5---->  
<-1.5RBS->  
T7.1: taaaggaggtacggccctaggcactaaaggaggtacacaccatgatgtactta  
----ø1.5----><D19R> <-1.5RBS-> <----1.5---->  
<D20L>

#### U4

T7: gtcattgtaggatgccttgcgctccactgtagcgatgat  
-----1.5----->  
T7.1: gtcattgtaggatgccttgcTctTcactgtagcgatgat  
-----1.5----->  
<-U4-->

#### Part20-Part21: 1.5-ø1.6

T7: tgccagatggtcacgcttaatacagactcact  
-----1.5----->  
<-----ø1.6----->  
T7.1: tgccagatggtcacgcttaacctaggacgtctggtcacgcttaatacagactcact  
-----1.5-----><D20L> <-----ø1.6----->  
<D21L>

#### Part21-Part22: ø1.6-1.6

T7: taaaggagacactatattttcagactt  
----ø1.6----> <----1.6---->  
<-1.6RBS->  
T7.1: taaaggagacacgagctctagacactaaaggagacactatattttcagactt  
----ø1.6----><D21R> <-1.6RBS-> <----1.6---->  
<D22L>

#### Par22-Part23: 1.6-1.7

T7: tcaggaggttcttgatgggactgtta  
-----1.6----->  
<--1.7RBS--> <----1.7---->  
T7.1: tcAAAgatgttcttgatctagaccggttcaaggaggttcttgatgggactgtta  
-----1.6-----><D22R><D23L> <--1.7RBS--> <----1.7---->

---

### Changes in Section Beta

#### Part23-Part24: 1.7-1.8

T7: gaactctttgagaaacataaggataaatgttatgcatcaacttcaagtca  
-----1.7----->  
<-1.8RBS-> <-----1.8----->  
T7.1: gaactctttgagaaacataaAgataaatgttaCgcataaccggtgacctctttgagaaacataaggataaatgttatgcatcaacttcaagtca  
-----1.7-----> <D24L-> <-1.8RBS-> <-----1.8----->  
<D23R>

#### Part24-Part25: 1.8-2

T7: gaactttgaaatcgagaggtcaatgactatgtcaaacgta  
-----1.8-----> <-----2----->  
<--RBS-->  
T7.1: gaactttgaaatcgagaggtcaatgaggtcacgtagcttggaaatcgagaggtcaatgactatgtcaaacgta  
-----1.8-----><D24R> <--2RBS--> <-----2----->  
<D25L>

#### Part25-Part26: 2-ø2.5

T7: ttgttagcaccgaagtaatacagactcactat  
-----2----->  
<-----ø2.5----->  
T7.1: ttgttagcaccgaagtaacgtacgaattcagcaccgaagtaatacagactcactat  
-----2-----><D25R> <-----ø2.5----->  
<D26L>

#### Part26-Part27: ø2.5-2.5

T7: cactattagggaaagactcctctgagaaccaaacgaaacctaaggagattaacattatggctaagaag  
----ø2.5----> <-2.5RBS-> <----2.5---->  
T7.1: cactattagggaaagaattcccgggcgaaacctaaggagattaacattatggctaagaag  
----ø2.5----><D26R> <-2.5RBS-> <----2.5---->  
<D27L>

#### Part27-Part28: 2.5-2.8

T7: gcagacgaagacggagacttctaagtgaactgcgg  
-----2.5-----><-----2.8----->  
<-2.8RBS->

T7.1: gcagacgaagacggGgacttctaa**cccg**gatccgaagacggagacttcta**gtg**gaactcgcg  
-----2.5-----><D27R> <-2.8RBS-> <----2.8---->  
<D28L>

### Part28-Part29: 2.8-3

T7: acgcaaa**gggag**cgacat**ggc**aggttacggcgctaa**agga**atccgaaa  
-----2.8----->  
<-3RBS-> <-----3----->  
T7.1: acgcaaa**gggag**Acgaca**Cggc**aggttacggcgctaa**ggatc**cg**ccg**c**aaagg**gagcgacat**ggc**aggttacggcgctaa**agga**atccgaaa  
-----2.8-----><D28R> <-3RBS-> <-----3----->  
<D29L>

### Part29-Part30: 3-3.5

T7: gattaaaaagga**aaagg**gaaagaa**ataat**ggctcgtgta  
-----3----->  
<-3.5RBS-> <----3.5---->  
T7.1: gattaaaa**CaaGggGgg**Gaagaa**ataac**gg**ccg**cc**gg**aaagga**aaagg**gaaagaa**ataat**ggctcgtgta  
-----3-----><D29R><D30L> <-3.5RBS-> <----3.5---->

### Part30-Part31: 3.5-ø3.8/R3.8

T7: tctgaccgtgga**ta**attaattgaactcactaaag  
-----3.5----->  
<-----ø3.8----->  
T7.1: tctgaccgtgga**taac**cg**gg**acat**gt**cgtggataattaattgaactcactaaag  
-----3.5-----><D30R><D31R><-----ø3.8----->

### Part31-Part32: ø3.8/R3.8-3.8

T7: tttccctttgttcgattg**ga**ggtcaa**ataat**acat**gtc**gacgaggtcaa**ataat**g**cg**caagtct  
-----R3.8-----> <-----3.8----->  
<-3.8RBS->  
T7.1: tttccctttgttcgattgaggtcaa**ataat**acat**gtc**gacgaggtcaa**ataat**g**cg**caagtct  
-----R3.8-----><D31R> <-3.8RBS-> <-----3.8----->  
<D32L>

---

## Changes in Section Gamma

### Part32-Part33: 3.8-4A/4B/4.1/4.2

T7: tagaact**agg**ggaattgca**tg**gacaattcgcacgattccgat**agt**gt  
-----3.8----->  
<-4ARBS-> <-----4A----->  
T7.1: tagaact**agAa**ggaattgca**Cgg**acaattcgcacgattccgat**aggtc**gac**gt**ac**g**ct**agg**ggaattgca**tg**gacaattcgcacgattccgat**agt**gt  
-----3.8-----><D32R> <-4ARBS-> <-----4A----->  
<D33L>

### Part33-Part34: 4A/4B/4.1/4.2-ø4.3

T7: ggagagtccattc**ta**atcagactcactaaa  
-----4.2----->  
<-----ø4.3----->  
T7.1: ggagagtccattc**taac**g**ta**cg**cc**gagtcctccattc**ta**atcagactcactaaa  
-----4.2-----><D33R> <-----ø4.3----->  
<D34L>

### Part34-Part35: ø4.3-4.3

T7: cta**aa**gga**g**acacacc**at**gttcaactg  
-----ø4.3-----> <-----4.3----->  
<-4.3RBS->  
T7.1: cta**aa**gga**g**acacacc**cg**cc**g**gtg**cg**cc**g**cta**aa**gga**g**acacacc**at**gttcaactg  
-----ø4.3-----><D34R> <D35L> <-4.3RBS-> <-----4.3----->

### Part35-Part36: 4.3-4.5

T7: ttctttgag**ta**atcaaac**agg**gaaaccatt**at**gttctaactgta  
-----4.3-----> <-4.5RBS-> <----4.5---->  
T7.1: ttctttgag**ta**at**g**cg**cg**cc**acc**ggcg**aa**acc**agg**gaaaccatt**at**gttctaactgta  
-----4.3-----><D35R><D36L-> <-4.5RBS-> <----4.5---->

### Part36-Part37: 4.5-R4.7/ø4.7

T7: attgataac**ta**agagtgtatcct  
-----4.5-----><-----R4.7--->  
T7.1: attgataac**taac**cc**gg**caag**ctt**aagagtgtatcct  
-----4.5-----><D36R-><D37L> <-----R4.7--->

### Part37-Part38: R4.7/ø4.7-4.7

T7: ctat**agg**gatattacc**at**g**cg**tgaccct  
-----ø4.7-----> <-----4.7----->  
<-4.7RBS->  
T7.1: ctat**agg**gatattacc**aa**g**ct**c**ct**gga**ct**at**agg**gatattacc**at**g**cg**tgaccct  
-----ø4.7-----><D37R> <-4.7RBS-> <-----4.7----->  
<D38L->

### Part38-Part39: 4.7-5

T7: aagtcacg**at**aatcaat**agg**gaaatcaat**at**g**at**cgtttct  
-----4.7-----> <-5RBS-> <-----5----->  
T7.1: aagtcacg**at**aat**ct**gga**g**ct**ag**catcaat**agg**gaaatcaat**at**g**at**cgtttct  
-----4.7-----><D38R-><D39L> <-5RBS-> <-----5----->

### Part39-Part40: 5-5.3

T7: atttgccac**tg**ataca**agg**gctactc**at**g**aac**gaaaga  
-----5-----> <-5.3RBS-> <-----5.3----->  
T7.1: atttgccac**tg**ag**ct**g**at**g**ct**acag**gg**gctactc**at**g**aac**gaaaga

-----5-----><D39R> <-5.3RBS-> <-----5.3----->  
<D40L>

#### Part40-Part41: 5.3-5.5

T7: ataaaacta**ag**gagaaattatt**atgg**ctatgaca  
-----5.3-----> <-----5.5----->  
<-5.5RBS->  
T7.1: ataaaacta**ag**cat**gccatgg**tataggagaaattatt**atgg**ctatgaca  
-----5.3-----> <D41L> <-5.5RBS-> <-----5.5----->  
<D40R>

#### Part41-Part42: 5.5-5.7

T7: acggaggtttc**gatg**tctgactac  
-----5.5----->  
<-5.7RBS-> <-----5.7----->  
T7.1: acgCgaggtttc**gac**cat**ggatcc**gggaggtttct**gatg**tctgactac  
-----5.5-----><41R> <-5.7RBS-> <-----5.7----->  
<42L>

#### Part42-Part43: 5.7-5.9

T7: tggaggtgtgt**cta**at**gtct**ctcgac  
-----5.7----->  
<-5.9RBS-> <-----5.9----->  
T7.1: tggCggtgtgt**cta**ag**gatcc**ggcgaatggaggtgtgt**cta**at**gtct**ctcgac  
-----5.7-----><D42R> <-5.9RBS-> <-----5.9----->  
<D43L>

#### Part43-Part44: 5.9-6

T7: ct**ag**gagaaactta**atgg**cacttct**tg**acc  
-----5.9----->  
<-6RBS-> <-----6----->  
T7.1: ct**ag**AgaAaaactta**ac**Cgacacttct**gac**cc**ggc**ggcgaact**ag**ggagaaactta**atgg**cacttct**tg**acc  
-----5.9-----><D43R> <-6RBS-> <-----6----->  
<D44L>

#### Part44-Part45: 6-6.3

T7: gacaaggagatttacct**gtg**gagacc**tag**cg  
-----6----->  
<-6.3RBS-> <-----6.3----->  
T7.1: gaca**agga**Aatttacct**C**tgagacc**ta**gg**cc**ggc**ca**aggaatttacct**gtg**gagacc**tag**cg  
-----6-----><D45L><-6.3-RBS-> <-----6.3----->  
<D44R>

#### Part45-Part46: 6.3-R6.5/ø6.5

T7: gacactaa**tg**ataaact  
-----6.3----->  
<---R6.5--->  
T7.1: gacactaa**AtA**acc**ggg**agctcactaagtataaact  
-----6.3-----><D45R> <---R6.5--->  
<D46L>

#### Part46-Part47: R6.5/ø6.5-6.5

T7: cgattattactttaagatttaactctaa**agga**atctttatt**atg**ttaacacct  
-----R6.5-----> <-6.5RBS-> <-----6.5----->  
T7.1: cgattattactttaagattta**ag**ct**cg**ag**ta**aggaatctttatt**atg**ttaacacct  
-----R6.5-----> <D46R> <-6.5RBS-> <-----6.5----->  
<D47L>

#### Part47-Part48: 6.5-6.7

T7: t**gat**gggaggt**gac**act**atg**tttctca  
-----6.5-----> <-----6.7----->  
<-6.7RBS->  
T7.1: t**gat**gg**Cga**Agat**gactcga**attctgatgggaggtgacact**atg**tttctca  
-----6.5-----><D47R> <-6.7RBS-> <-----6.7----->  
<D48L>

#### Part48-Part49: 6.7-7

T7: ttt**gag**gtaagaag**tgatg**tctgagttc  
-----6.7----->  
<-7RBS-> <-----7----->  
T7.1: ttt**gag**gtaagaag**tgaga**at**cgatc**gattt**ggag**taagaag**tgatg**tctgagttc  
-----6.7-----><D48R> <-7RBS-> <-----7----->  
<D49L>

#### Part49-Part50: 7-7.3

T7: ttt**ag**gaggt**ta**agtt**atgg**taagaaa  
-----7-----> <-----7.3----->  
<-7.3RBS->  
T7.1: ttt**ag**gaggt**ta**ac**gatc**gg**tc**gctt**ta**aggaaggtataagtt**atgg**taagaaa  
-----7-----><D49L> <-7.3RBS-> <-----7.3----->  
<D50R->

#### Part50-Part51: 7.3-7.7

T7: atcaacatt**ta**at**cg**aggttatct**gtg**gaagactgc  
-----7.3-----> <-7.7RBS-> <-----7.7----->  
T7.1: atcaacatt**ta**ac**ggtcc**g**ctc**ag**tc**aggaaggttatct**gtg**gaagactgc  
-----7.3-----><D50R-><D51L> <-7.7RBS-> <-----7.7----->



## Changes in Section Delta

### Part51-Part52: 7.7-8

T7: gacatggagacacatt**ta**atggctgagaaa  
-----7.7----->  
<-8RBS-> <-----8----->  
T7.1: gacatggagacacatt**ta**actg**cg**cgctacgagacatggagacacatt**ta**atggctgagaaa  
-----7.7-----><D51R><D52L> <-8RBS-> <-----8----->

### Part52-Part53: 8-ø9

T7: cagccgggaatt**ta**atcagactcactatag  
-----8----->  
<-----ø9----->  
T7.1: cagccgggaatt**ta**acg**ta**cgatcgccgggaatt**ta**atcagactcactatag  
-----8-----><D52L> <-----ø9----->  
<D53L>

### Part53-Part54: ø9-9

T7: tagggagacctcatctttgaaatgagcgatgacaagaggttgagctcctcggtcttctctgtagttcaactttaaggagacaataata**at**ggctgaat  
-----ø9-----> <-----9----->  
<-9RBS-> <-----9----->  
T7.1: tagggagacctcatctttgaaatgag**cg**at**cg**aacaagaggttgagctcctcggtcttctctg**ta**gaat**ta**ac**ta**aggagacaataata**at**ggctgaat  
-----ø9-----> <D53R> <D54L> <-9RBS-> <-----9----->

### Part54-Part55: 9-ø10

T7: tcgaactt**ct**gatagacttcgaatta  
-----9-----> <-----ø10----->  
T7.1: tcgaactt**ct**gata**ga**at**tc**cgcgacttcgaatta  
-----9-----> <D54R> <-----ø10----->  
<D55L>

### Part55-Part56: ø10-10A/B

T7: tataggagaccacaacggtttcctctagaataatttgtttaactttaaga**agg**agatatacat**at**ggctagcatg  
-----ø10-----> <-10RBS-> <-----10----->  
T7.1: tataggagaccaca**acc**g**gg**at**cc**ctctagaataatttgtttaactttaaga**agg**agatatacat**at**ggctagcatg  
-----ø10-----> <D55R> <-10RBS-> <-----10----->  
<D56L>

### Part56-Part57: 10A/B-Tø

T7: gctgagcaat**aa**ctagcataaacccttggggcct  
-----10-----> <-----Tø----->  
T7.1: gctgagcaat**aa**ggat**cc**gggctagcataaacccttggggcct  
-----10-----><D56R> <-----Tø----->  
<D57L>

### Part57-Part58: Tø-11

T7: gtttttctgta**aa**ggaggaactat**at**cgctcata  
--Tø--> <-11RBS-> <-----11----->  
T7.1: gtttttctgta**cc**ggg**cc**ctgaa**agg**gaactat**at**cgctcata  
--Tø--> <D57R> <-11RBS-> <-----11----->  
<D58L>

### Part58-Part59: 11-12

T7: tgactcgc**ta**cattataaata**aa**ggagctct**aa**tgccactcat  
-----11-----> <-12RBS-> <-----12----->  
T7.1: tgactcgc**ta**aggg**cc**aagct**ta**ataa**aa**ggagctct**aa**tgccactcat  
-----11-----><D58R><D59L> <-12RBS-> <-----12----->

---

## Changes in Section Epsilon

### Part59-Part60: 12-R13/ø13

T7: ccggtatt**ta**ataaatctccctgtgg  
-----12-----> <-----R13----->  
T7.1: ccggtatt**ta**at**aa**gct**cc**cgga**tt**ctccctgtgg  
-----12-----> <D59L> <-----R13----->  
<D60R->

### Part60-Part61: R13/ø13-13

T7: tatagggagaacaatacactacgga**gg**ggtttctt**at**gatgactat  
-----ø13-----> <-13RBS-> <-----13----->  
-----R13----->  
T7.1: tatagggagaacaata**cc**cg**ga**at**tc**acggaggggtttctt**at**gatgactat  
-----ø13-----> <D60R-> <-13RBS-> <-----13----->  
-----R13-----> <D61L>

### Part61-Part62: 13-14

T7: acgaa**agg**agga**ta**accat**at**gtgtgggc  
-----13-----> <-----14----->  
<-14RBS->  
T7.1: acgaa**agg**C**gg**C**ta**ag**aa**tt**cg**ta**cg**cacgaa**agg**agga**ta**accat**at**gtgtgggc  
-----13-----><D61R> <-14RBS-> <-----14----->  
<D62L>

### Part62-Part63: 14-15

T7: gacgggaggt**aa**t**at**gact**at**gagtaaaa  
-----14-----> <-----15----->  
<-15RBS->  
T7.1: gac**C**g**g**C**gg****ta**ac**gt****ta**cgat**cg**ccaagacgggaggt**aa**t**at**gact**at**gagtaaaa  
-----14-----><D62R> <-15RBS-> <-----15----->

<D63L>

Part63-Part64: 15-16

T7: gtaaggagtaactaaaggctacataaaggagccctaaatggataagta  
----15----> <-16RBS-> <----16---->  
T7.1: gtaaggagtaacgatcgccgctaaaggctacataaaggagccctaaatggataagta  
----15----><D63R> <-16RBS-> <----16---->  
<D64L>

Changes in Section Zêta

Part64-Part65: 16-ø17

T7: gggagcgtaggaataaacacgactcactatag  
-----16----->  
<-----ø17----->  
T7.1: gggagcgtaggaataaacggcgcgcgctaggaataaacgactcactatag  
-----16-----><D64R> <-----ø17----->  
<D65L>

Part65-Part66: ø17-17

T7: gggagagcgaaataatctctcctctgtagctcttagatttactttaaggaggtcaaatggctaacgt  
--ø17--> <-17RBS-> <----17---->  
T7.1: gggagagcgaaataatctctcctcggcggtgttaagctcttagatttactttaaggaggtcaaatggctaacgt  
--ø17--> <D65R> <D66L> <-17RBS-> <----17---->

Part66-Part67: 17-17.5

T7: aacgagtaattggttaaatcacaaggaagcgtgtagctccaggtgactctcaaggaggtacaaggtgctatca  
---17---> <-17.5RBS-> <--17.5-->  
T7.1: aacgagtaattggttaaatcacaaagcttgaagcgtgtagctccaggtgactctcaaggaggtacaaggtgctatca  
---17---> <D66R> <D67L> <-17.4RBS-> <--17.5-->

Part67-Part68: 17.5-18

T7: caataaaggagtgatatgtaaggaaaagga  
----17.5----> <----18---->  
<-18RBS->  
T7.1: caataaAgaAtgaggatccgggaataaaggagtgatatgtaaggaaaagga  
----17.5----><D67R> <-18RBS-> <----18---->  
<D68L>

Part68-Part69: 18-R18.5

T7: cattacagtgaatataactcaa  
----18---->  
<-----R18.5----->  
T7.1: cattacaatagccgggcccacattacagtataactcaa  
----18----><D68R> <-----R18.5----->  
<D69L>

Part69-Part70: R18.5-E/18.5/18.7

T7: gtcattgtctatacagatgctcctacgtgaaatctgaaagttaacggagcattatgctagaatt  
-R18.5-> <-----E----->  
<-18.5RBS-> <----18.5--->  
T7.1: gtcattgtctatacagatgctgggcccacgtgaattctgaaagttaacggagcattatgctagaatt  
-R18.5-> <D69R> <D70L> <-18.5RBS-> <----18.5--->

Part70-Part71: E/18.5/18.7-19/19.2/19.3

T7: aacgtaagttaggaatcaagtaaggagcgaatgtgtctactca  
---18.5---> <-19RBS-> <----19---->  
T7.1: aacgtaagttaggaattcgtacgaagtaaggagcgaatgtgtctactca  
---18.5---><D70R> <-19RBS-> <----19---->  
<D71L>

Part71-Part72: 19/19.2/19.3-øOR

T7: ggtagttatgcatagtagctgcatagggatgactatagaccacggatggtcagttctttaagttactgaaagacacgat  
-19-> <-øOR->  
T7.1: ggtagttatgcatagtagctgcatagggatgactatagaccacgtacgatggtcagttctttaagttactgtagaaagacacgat  
-19-> <D71R> <D72L> <-øOR->

Part72-Part73: øOR-19.5

T7: gagagga...94nt... gattatattgtattagatcaccttaactaaggaccaacataaaggagagactcattgttcc  
-øOR-> <-19.5RBS-> <-19.5->  
T7.1: gagagga...94nt... gattatattgtattagatcaccttaactgacgtcgaccaacataaaggagagactcattgttcc  
-øOR-> <D72R> <-19.5RBS-> <-19.5->  
<D73L>

Part73-SRR/TR: 19.5-SRR/TR

T7: cgatagggtctctgaccgactgatggctcaccgaggttcagcggtatgattgcatcacaccacttcacccctata  
-19.5-> <-SRR->  
T7.1: cgatagggtcgactctctgaccgactgatggctcaccgaggttcagcggtatgattgcatcacaccacttcacccctata  
-19.5-> <D73R> <-SRR->
